# Supplementary material for: Peptide cyclisation promoted by supramolecular complex formation
Source: Royal Society of Chemistry journal article supplement (doi:10.1039/d1ob02309h), 2021-12-16
Supplement: d1ob02309h1.pdf [file d1ob02309h1.pdf]

## Peptide cyclisation promoted by supramolecular complex formation

Arnout P.T. Hartendorp, Felix J. de Zwart, Hans Bieräugel, Bas de Bruin, Joost N.H. Reek and Jan H. van Maarseveen\*

*Van 't Hoff Institute for Molecular Sciences (HIMS),  
University of Amsterdam, The Netherlands*

j.h.vanmaarseveen@uva.nl

### Contents

|                                                                         |    |
|-------------------------------------------------------------------------|----|
| General methods and materials .....                                     | 2  |
| General cyclisation procedure .....                                     | 2  |
| Determination of association constants between ZnTPP and <b>7</b> ..... | 2  |
| Syntheses of new compounds .....                                        | 7  |
| Spectral data of new compounds .....                                    | 8  |
| Computational details .....                                             | 16 |
| References .....                                                        | 17 |

## General methods and materials

All reactions were performed under normal atmosphere, without precautions as N<sub>2</sub> or Ar atmosphere, unless stated otherwise. THF was distilled over sodium/benzophenone under N<sub>2</sub> atmosphere. Dichloromethane and methanol were distilled over CaH under N<sub>2</sub> atmosphere. Triethylamine was distilled over KOH pellets under N<sub>2</sub> atmosphere. All column chromatography was performed using SiO<sub>2</sub> (0.04 – 0.06 μm) unless otherwise specified. NMR spectra were recorded on a Bruker DRX 300, AMX 400 or DRX 500. <sup>1</sup>H NMR chemical shifts are given in ppm and referenced to the residual non-deuterated solvent: 7.26 ppm for CDCl<sub>3</sub>, 5.32 ppm for CD<sub>2</sub>Cl<sub>2</sub>, 4.79 ppm for D<sub>2</sub>O, and 2.50 ppm for DMSO.<sup>[17]</sup> <sup>13</sup>C NMR chemical shifts are referenced to the deuterated solvent: 77.10 ppm for CDCl<sub>3</sub>, 53.84 ppm for CD<sub>2</sub>Cl<sub>2</sub> and 39.52 for DMSO-*d*<sub>6</sub>.<sup>[1]</sup>

LC-MS measurements were carried out on a Finnigan Surveyor LC and Finnigan LXQ equipped with Reprosil-Pur 120 C18-Q, 3 μm, 50 x 4.6 mm column. Elution was performed using a gradient program from H<sub>2</sub>O/0.1% HCO<sub>2</sub>H to CH<sub>3</sub>CN/0.1% HCO<sub>2</sub>H over 5 or 10 minutes. MS (ESI+) spectra (positive ions) were recorded on a Finnigan LXQ in full scan mode (*m/z* = 100 – 2000).

HRMS (ESI+) spectra were recorded on an AccuTOF LC, JMS-T100LP Mass spectrometer (JEOL, Japan) using an ESI source with the following settings: needle voltage: 2000V, orifice 1 voltage: 90V, orifice 2 voltage: 9V, ring lens voltage 22V, orifice and desolvating temperature: 30 °C, spray temperature -40 °C. HRMS (FD+) spectra were recorded on an AccuTOF GC v 4g, JMS-T100GCV mass spectrometer (JEOL, Japan) with the following settings: GCMS (EI) filament ionizing voltage 70V, FD /FI probe equipped with FD Emitter, Carbotec (Germany) FD 13 μm, current rate 51.2mA/min over 1.2 min, counter electrode -10 kV, ion source 37V.

IR spectra were recorded on a Bruker Alpha FTIR. Microwave heating was carried out using a CEM discover (Model number: 908010).

ZnTPP<sup>[2]</sup>, peptide **4**<sup>[3]</sup>, Boc-Phe-β-Ala-OH<sup>[3]</sup>, N<sub>3</sub>-Phe-β-Ala-OH<sup>[4]</sup>, and 2,6-bis(pyridin-4-ylethynyl)phenyl acetate **7**<sup>[5]</sup> were prepared according to literature procedures. Other compounds were obtained from commercially available sources (Sigma-Aldrich, Fluorochem) and used without further purification.

### *General cyclisation procedure*

A general procedure for peptide cyclisation is as follows. Azide (0.042 mmol), PPh<sub>3</sub> (1.1 equiv, 0.046 mmol), porphyrin (3 equiv, 0.125 mmol) and 1,3,5-trimethoxy benzene (internal standard, 1 equiv, 0.042 mmol) were combined in a microwave vial and dissolved in 2.5 ml THF-*d*<sub>8</sub>. The vial was heated in a microwave at 80 °C for 5 hours, after which 60 μl of water was added and the vessel heated for an additional hour at 80 °C in the microwave. Reaction yields were determined by <sup>1</sup>H NMR.

### *Determination of association constants between ZnTPP and 7*

A host-guest NMR titration was performed by titrating a solution of host (ZnTPP in thf-*d*<sub>8</sub>) against a solution of host and guest (ZnTPP and **7** in thf-*d*<sub>8</sub>), keeping the host concentration constant. Peak shifts were fitted to a 2:1, non-cooperative binding using Bindfit v0.5. Found association constant: 236 ± 5% M<sup>-1</sup> (28 °C).

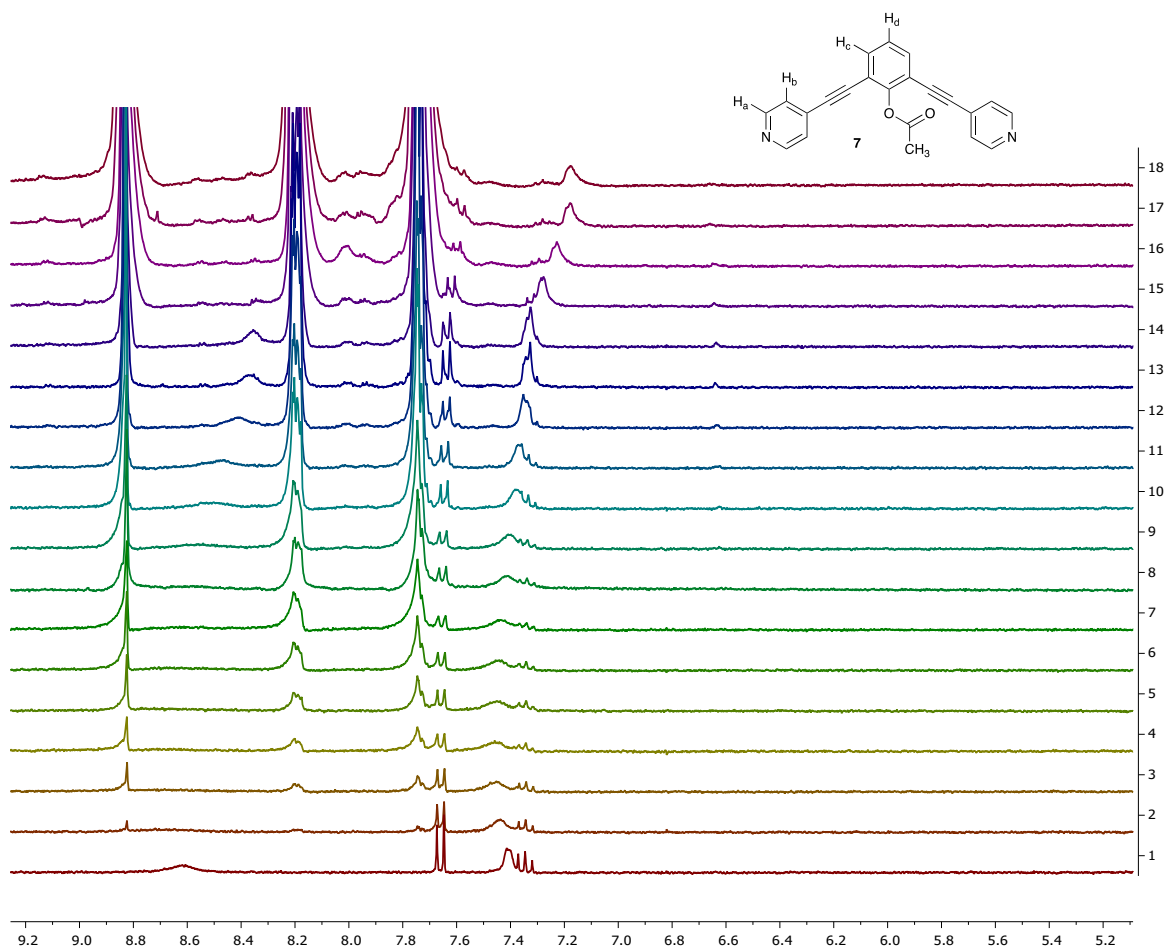

**Figure S1: NMR spectra of 2,6-bis(pyridin-4-ylethynyl)phenyl acetate 7 and varying amounts of ZnTPP at 28 °C.**

| #  | Host concentration / mM | Guest concentration / mM | Proton 1 shift | Proton 2 shift | Proton 3 shift | eq guest to host |
|----|-------------------------|--------------------------|----------------|----------------|----------------|------------------|
| 1  | 1.1624                  | 0.0000                   | 7.65           | 7.4084         | 2.4133         | 0.00             |
| 2  | 1.1624                  | 0.1992                   | 7.65           | 7.4385         | 2.4113         | 0.17             |
| 3  | 1.1624                  | 0.3968                   | 7.64           | 7.454          | 2.4091         | 0.33             |
| 4  | 1.1624                  | 0.5929                   | 7.64           | 7.4504         | 2.4093         | 0.49             |
| 5  | 1.1624                  | 0.7874                   | 7.64           | 7.45           | 2.4092         | 0.66             |
| 6  | 1.1624                  | 1.0763                   | 7.64           | 7.4396         | 2.4074         | 0.90             |
| 7  | 1.1624                  | 1.4563                   | 7.64           | 7.4367         | 2.4049         | 1.21             |
| 8  | 1.1624                  | 1.8304                   | 7.64           | 7.4114         | 2.4032         | 1.53             |
| 9  | 1.1624                  | 2.7410                   | 7.64           | 7.3973         | 2.401          | 2.28             |
| 10 | 1.1624                  | 3.6178                   | 7.63           | 7.3776         | 2.3968         | 3.01             |
| 11 | 1.1624                  | 4.4627                   | 7.63           | 7.3696         | 2.3949         | 3.72             |
| 12 | 1.1624                  | 5.2773                   | 7.63           | 7.3521         | 2.3881         | 4.40             |
| 13 | 1.1624                  | 6.8221                   | 7.62           | 7.3437         | 2.3876         | 5.69             |
| 14 | 1.1624                  | 7.6988                   | 7.62           | 7.3375         | 2.3872         | 6.42             |
| 15 | 1.1624                  | 10.9984                  | 7.61           | 7.2775         | 2.3677         | 9.17             |
| 16 | 1.1624                  | 13.8205                  | 7.59           | 7.2284         | 2.345          | 11.52            |
| 17 | 1.1624                  | 17.9898                  | 7.57           | 7.1793         | 2.3279         | 14.99            |
| 18 | 1.1624                  | 21.6232                  | 7.57           | 7.1794         | 2.3293         | 18.02            |

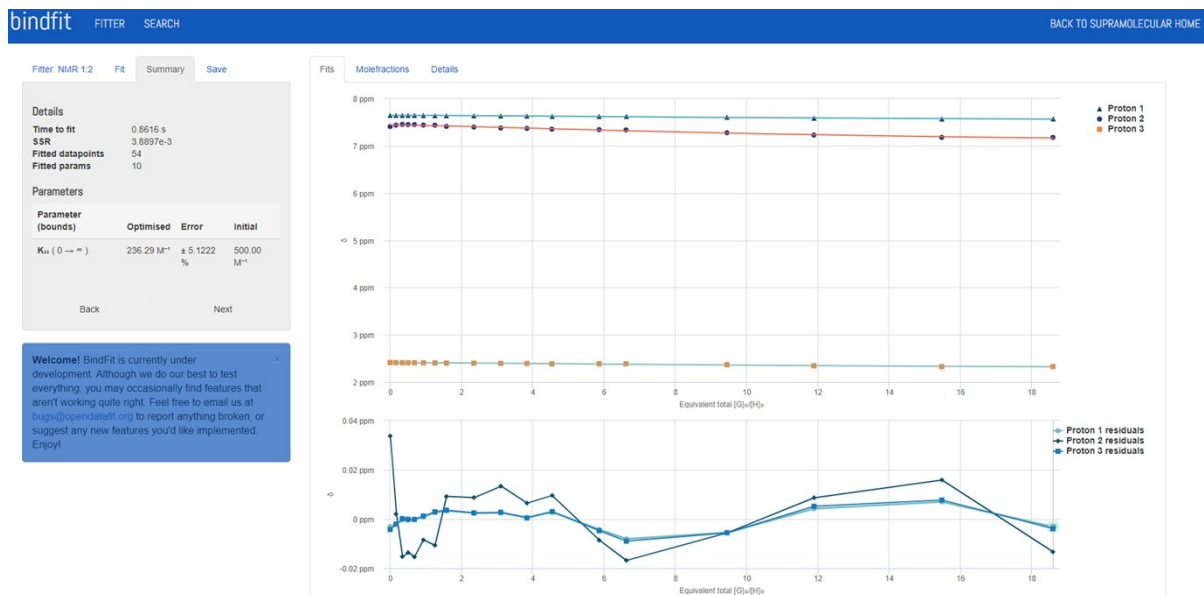

**Figure S2: Non-cooperative 1:2 fit of 7 and ZnTPP at room temperature**

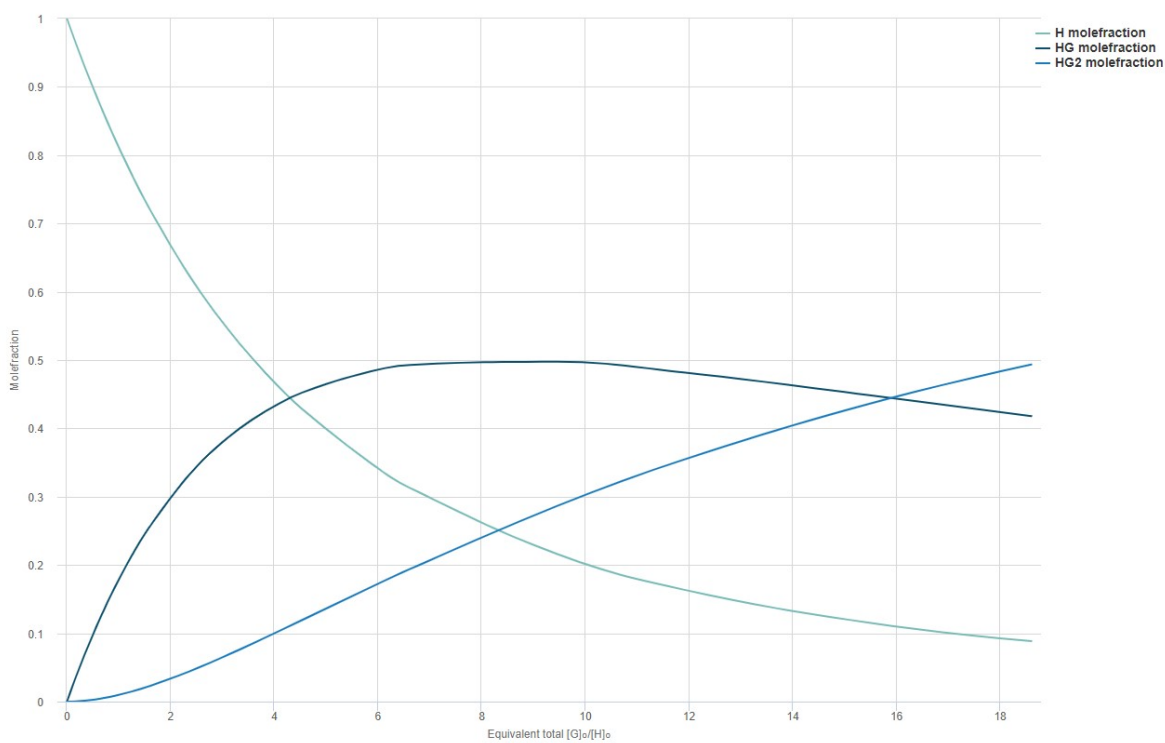

**Figure S3: Calculated mole fractions of the non-cooperative 1:2 fit of 7 and ZnTPP at room temperature**

## Quality of fit

| Fit          | RMS              | Covariance       |
|--------------|------------------|------------------|
| Proton 1     | 3.6775e-3        | 2.2602e-2        |
| Proton 2     | 1.3625e-2        | 2.3807e-2        |
| Proton 3     | 4.1161e-3        | 2.3399e-2        |
| <b>Total</b> | <b>8.4872e-3</b> | <b>2.2852e-2</b> |

## Coefficients

| Fit      | H      | HG     | HG2    |
|----------|--------|--------|--------|
| Proton 1 | 7.6442 | 7.6506 | 7.4847 |
| Proton 2 | 7.4421 | 7.4035 | 6.9155 |
| Proton 3 | 2.4091 | 2.4156 | 2.2340 |

**Figure S4: Details of the non-cooperative 1:2 fit of 7 and ZnTPP at room temperature**

## Syntheses of new compounds

### Compound 1a

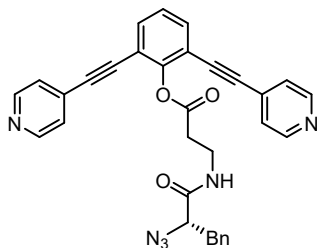

Synthesised according to a modified literature procedure.<sup>[14]</sup> N<sub>3</sub>-Phe-β-Ala-OH (0.5 mmol, 130 mg) and DCC (0.53 mmol, 110 mg) were dissolved in dry DCM (4 ml), placed under argon atmosphere, cooled to 0 °C and stirred for 30 minutes. **9** (0.5 mmol, 150 mg) was added and the mixture was stirred for two days at rt. The mixture was diluted with some ethyl acetate, filtered and immobilized on SiO<sub>2</sub>. Purified twice using column chromatography (100% EtOAc), then DCM/acetone (3:1 → 2:1) to yield the compound as a dark oil (0.13 mmol, 67 mg, 25%). <sup>1</sup>H NMR (500 MHz, CDCl<sub>3</sub>) δ 8.67 – 8.61 (m, 4H), 8.62 – 8.59 (m, 2H), 7.63 (d, *J* = 8.1 Hz, 2H), 7.37 – 7.34 (m, 4H), 7.33 – 7.27 (m, 2H), 7.25 – 7.21 (m, 1H), 7.16 (d, *J* = 7.6 Hz, 2H), 3.93 (dd, *J* = 8.5, 4.1 Hz, 1H), 3.73 – 3.53 (m, 2H), 3.25 (dd, *J* = 14.1, 4.1 Hz, 1H), 3.00 – 2.82 (m, 3H). <sup>13</sup>C NMR (126 MHz, CDCl<sub>3</sub>) δ 169.24, 168.74, 152.13, 150.49, 150.05, 149.88, 140.42, 135.95, 134.03, 130.39, 129.38, 128.65, 127.27, 126.48, 125.43, 125.39, 120.53, 117.44, 112.02, 99.99, 91.85, 87.61, 65.42, 38.61, 34.92, 33.72. IR: 2105, 1764, 1672, 1589 cm<sup>-1</sup>. MS (ESI, [M+H]<sup>+</sup>) *m/z* 541.2. HRMS (ESI, [M+H]<sup>+</sup>) calc. for C<sub>32</sub>H<sub>24</sub>N<sub>6</sub>O<sub>3</sub> 541.1983, found 541.2004.

### Compound 1b

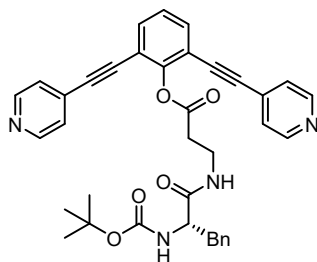

Similar procedure as **12**, with Boc-Phe-β-Ala-OH instead of N<sub>3</sub>-Phe-β-Ala-OH. Yield: 157 mg, 0.27 mmol, 55%. <sup>1</sup>H NMR (400 MHz, THF-*d*<sub>8</sub>) δ 8.61 (bs, 4H), 7.66 (d, *J* = 7.8 Hz, 2H), 7.44 (d, *J* = 5.0 Hz, 4H), 7.35 (t, *J* = 7.8 Hz, 1H), 7.24 – 7.09 (m, 5H), 6.36 (d, *J* = 8.7 Hz, 1H), 4.23 (q, *J* = 7.6 Hz, 1H), , 3.56 – 3.46 (m, 2H), 3.13 – 2.98 (m, 1H), 2.98 – 2.73 (m, 2H), 1.35 (s, 9H). <sup>13</sup>C NMR (101 MHz, THF-*d*<sub>8</sub>) δ 172.19, 168.87, 155.98, 153.64, 150.88, 138.72, 134.39, 130.65, 130.05, 128.68, 126.97, 126.87, 125.93, 118.43, 92.54, 87.95, 78.86, 56.65, 39.32, 35.79, 34.21, 30.45, 28.41. IR: 2926, 2219, 2082, 1768 cm<sup>-1</sup>. MS (ESI, [M+H]<sup>+</sup>) *m/z* 615.1. HRMS (FD+, [M+H]<sup>+</sup>) calc. for C<sub>37</sub>H<sub>34</sub>N<sub>4</sub>O<sub>5</sub> 615.2607, found 615.2602.

### Compound 1c

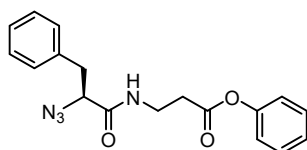

N<sub>3</sub>-Phe-β-Ala-OH (163 mg, 0.62 mmol) and phenol (54 mg, 0.58 mmol) were combined in 10 ml DCM/THF (8:2 v/v). EDC·HCl (132 mg, 0.69 mmol) and DMAP (6 grains) were added and the mixture was stirred for 21 hours at rt, after which it was concentrated *in vacuo* and purified using column chromatography (PE/EtOAc 8:2) to obtain the compound as a colorless oil (24 mg, 0.07 mmol, 12%). (Low yield is due to solubility issues during the loading of the mixture on the column.) <sup>1</sup>H NMR (500 MHz, CDCl<sub>3</sub>) δ 7.44 – 7.39 (m, 2H), 7.36 – 7.25 (m, 6H), 7.14 – 7.04 (m, 2H), 6.82 – 6.71 (bs, 1H), 4.32 – 4.14 (m, 1H), 3.72 – 3.53 (m, 2H), 3.35 (dd, *J* = 14.0, 4.5 Hz, 1H), 3.08 (dd, *J* = 14.0, 7.7 Hz, 1H), 2.82 – 2.66 (m, 2H). <sup>13</sup>C NMR (126 MHz, CDCl<sub>3</sub>) δ 170.76, 168.62, 135.99, 129.53, 128.63, 127.27, 126.06, 121.38, 65.45, 38.50, 34.71, 34.04. IR: 2920, 2111, 1754, 1662, 1529, 1493, 1195, 1165, 1148 cm<sup>-1</sup>. HRMS (FD+, [M]<sup>+</sup>) calc. for C<sub>18</sub>H<sub>18</sub>N<sub>4</sub>O<sub>3</sub> 338.1379, found 338.1341.

## Spectral data of new compounds

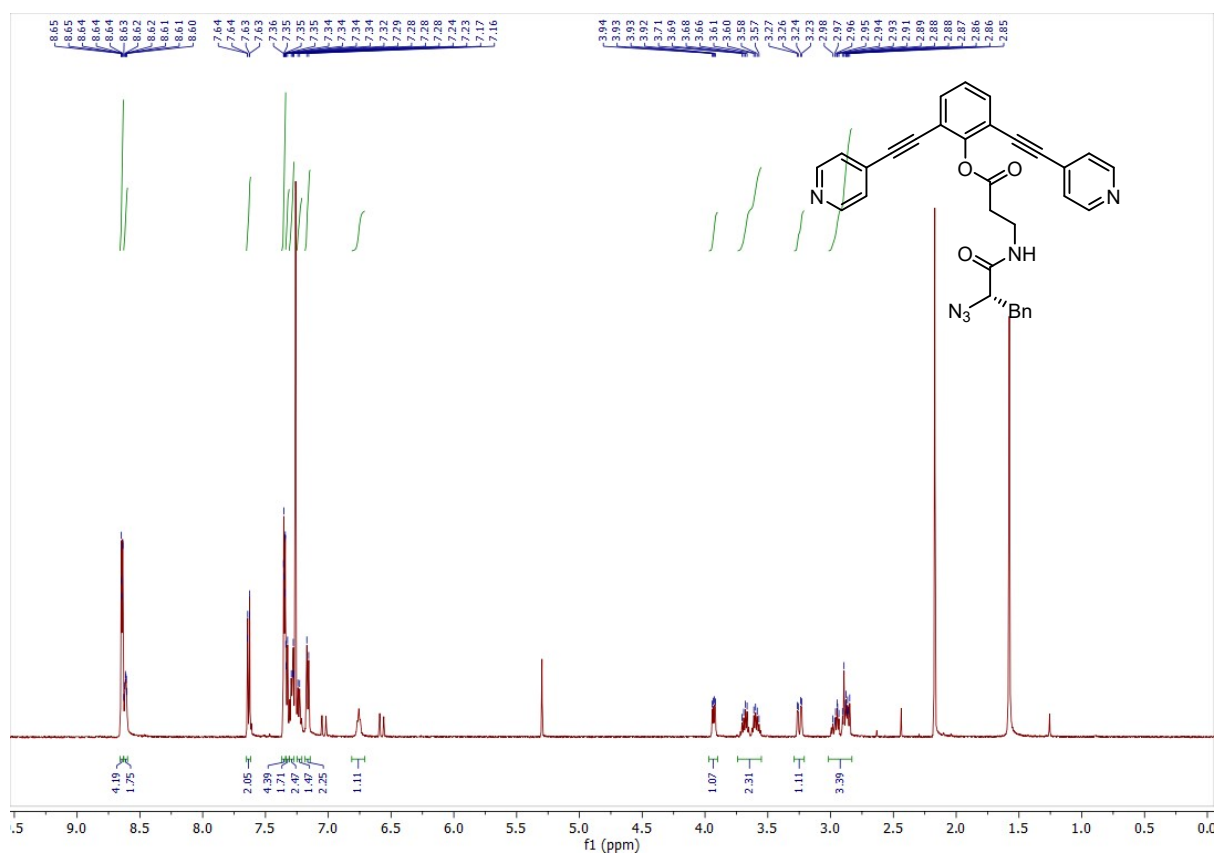

Figure S3:  $^1\text{H}$  NMR of compound 1a.

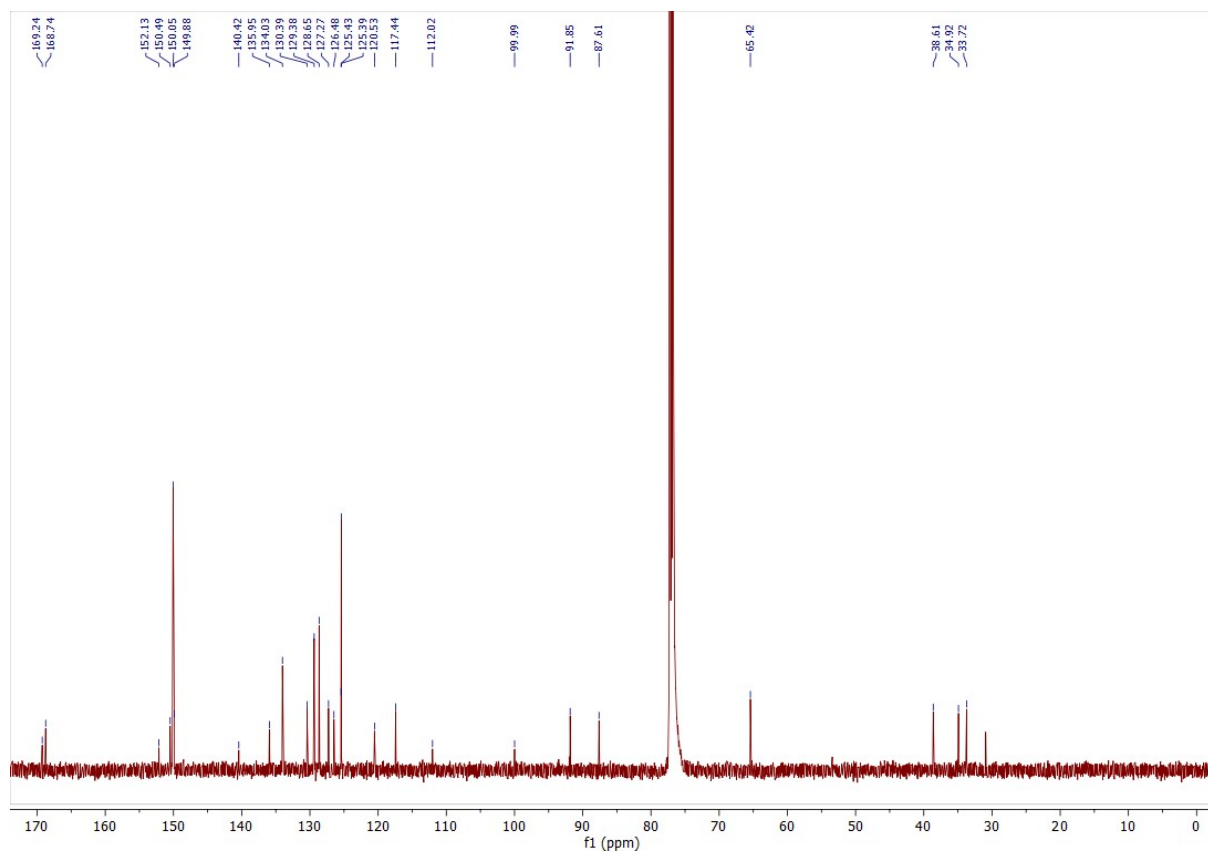

Figure S4:  $^{13}\text{C}$  NMR of compound 1a.

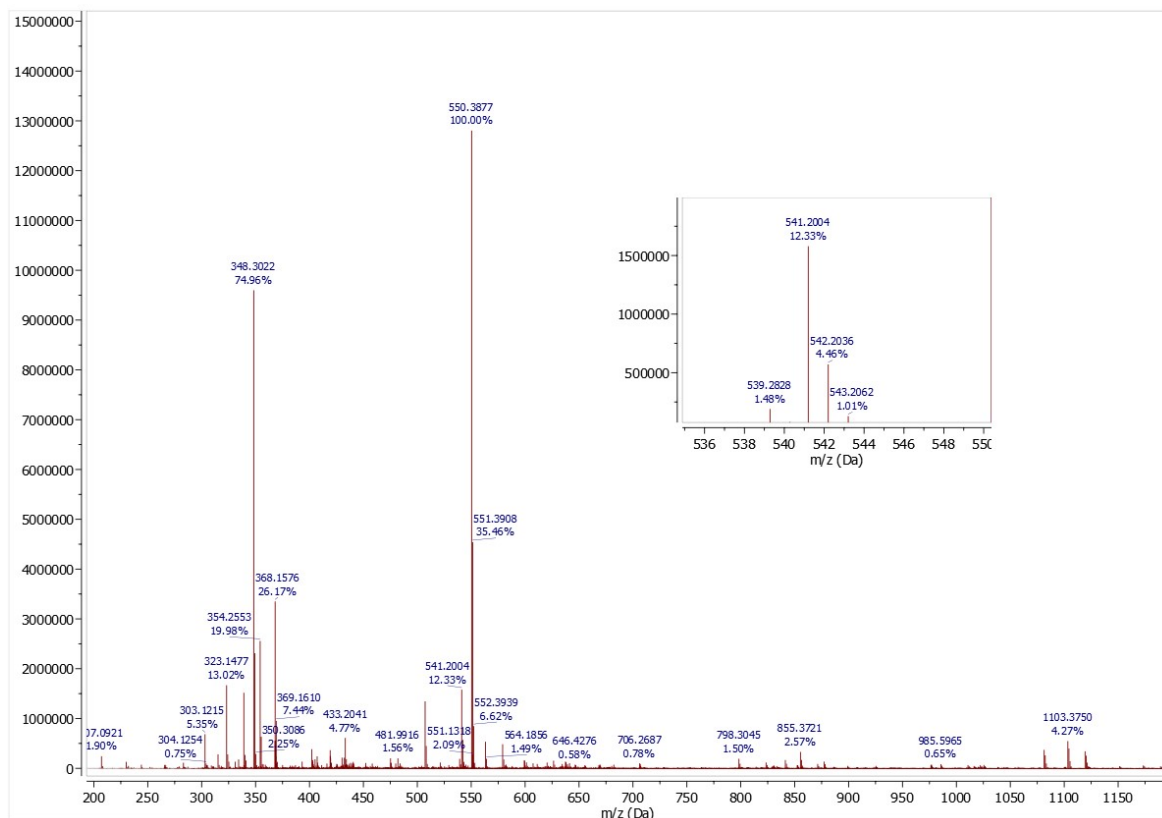

Figure S5: HRMS (ESI) spectrum of compound 1a.  $m/z$  550.3877 originates from an impurity (see LC-MS results below).

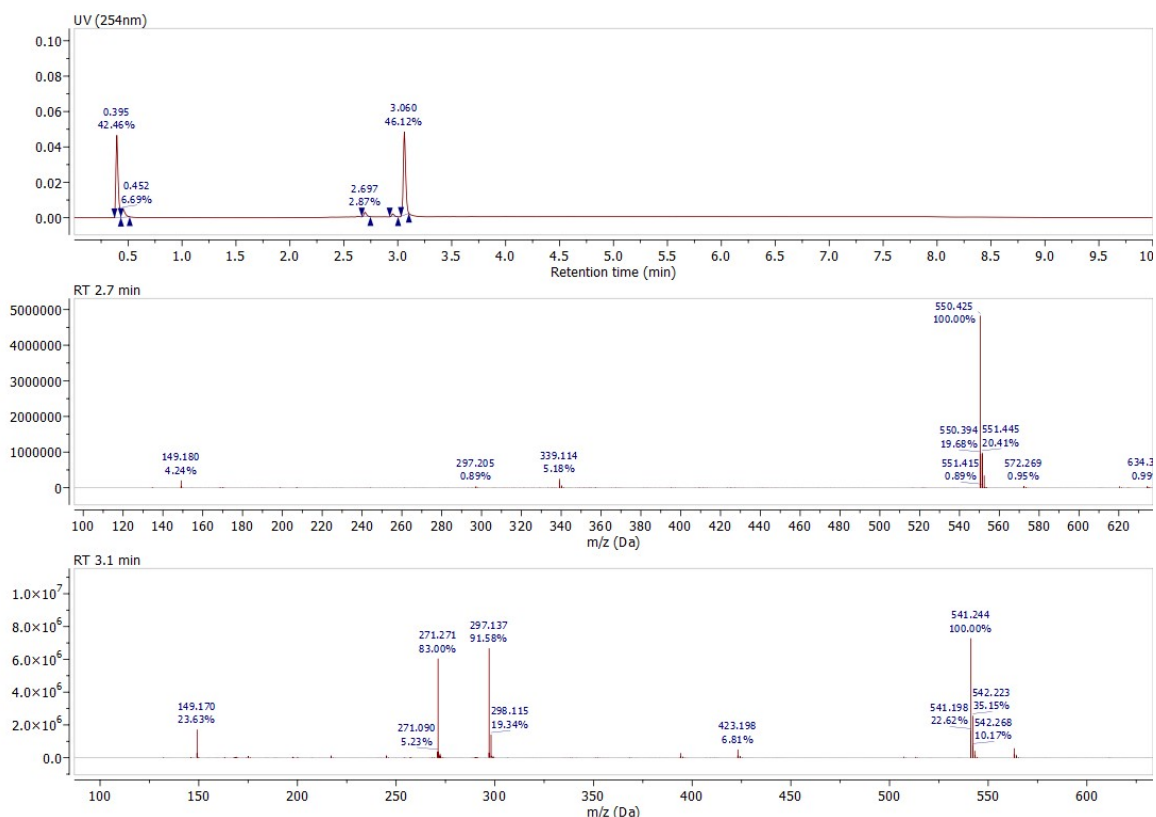

Figure S6: LC-MS traces (top: UV, 254 nm) and MS spectra of the peaks at RT 2.7 (middle: impurity,  $m/z$  550.425) and RT 3.1 minutes (bottom: compound 1a,  $m/z$  541.244).



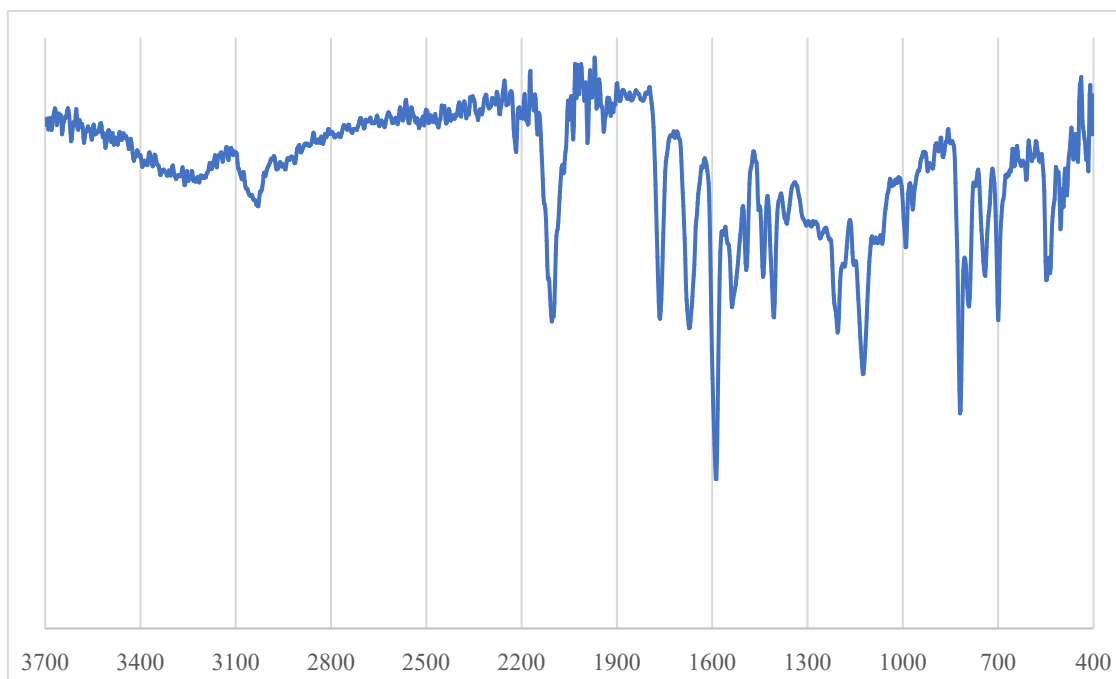

**Figure S7: IR spectrum of compound 1a.**

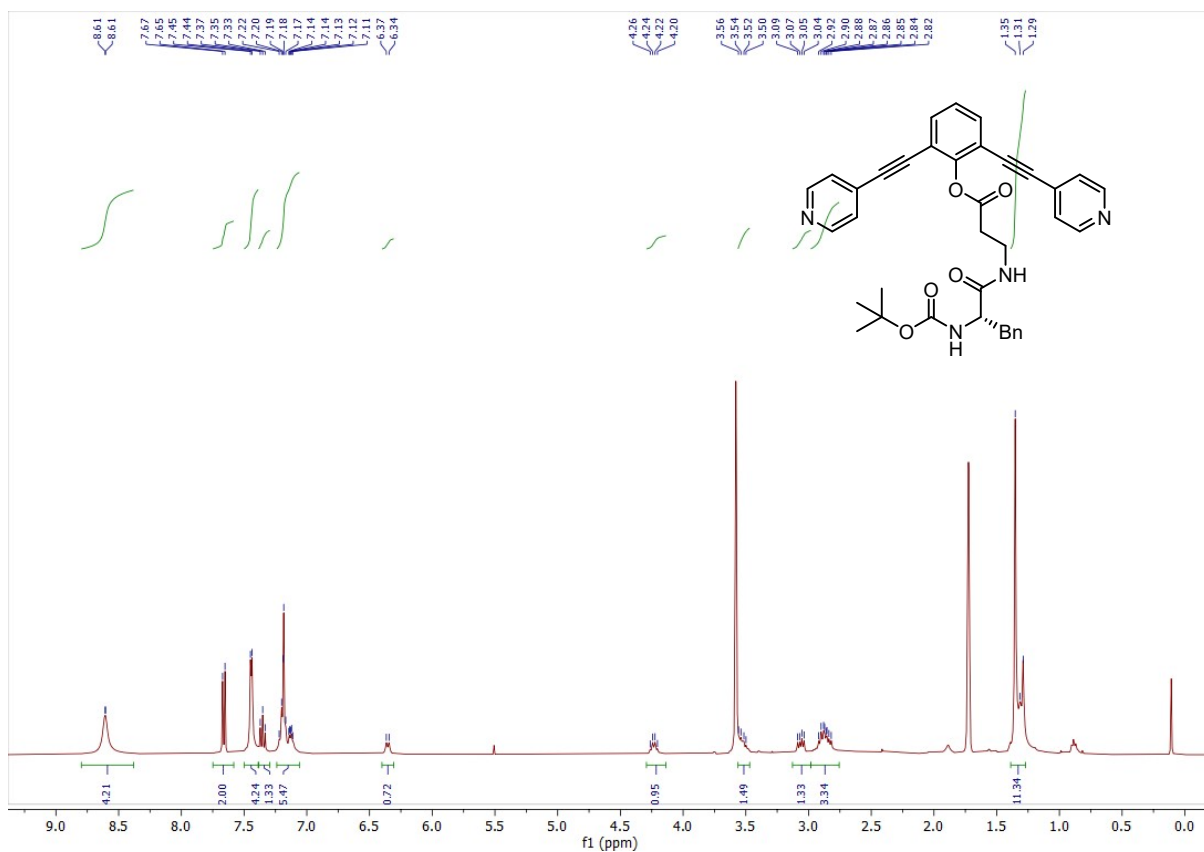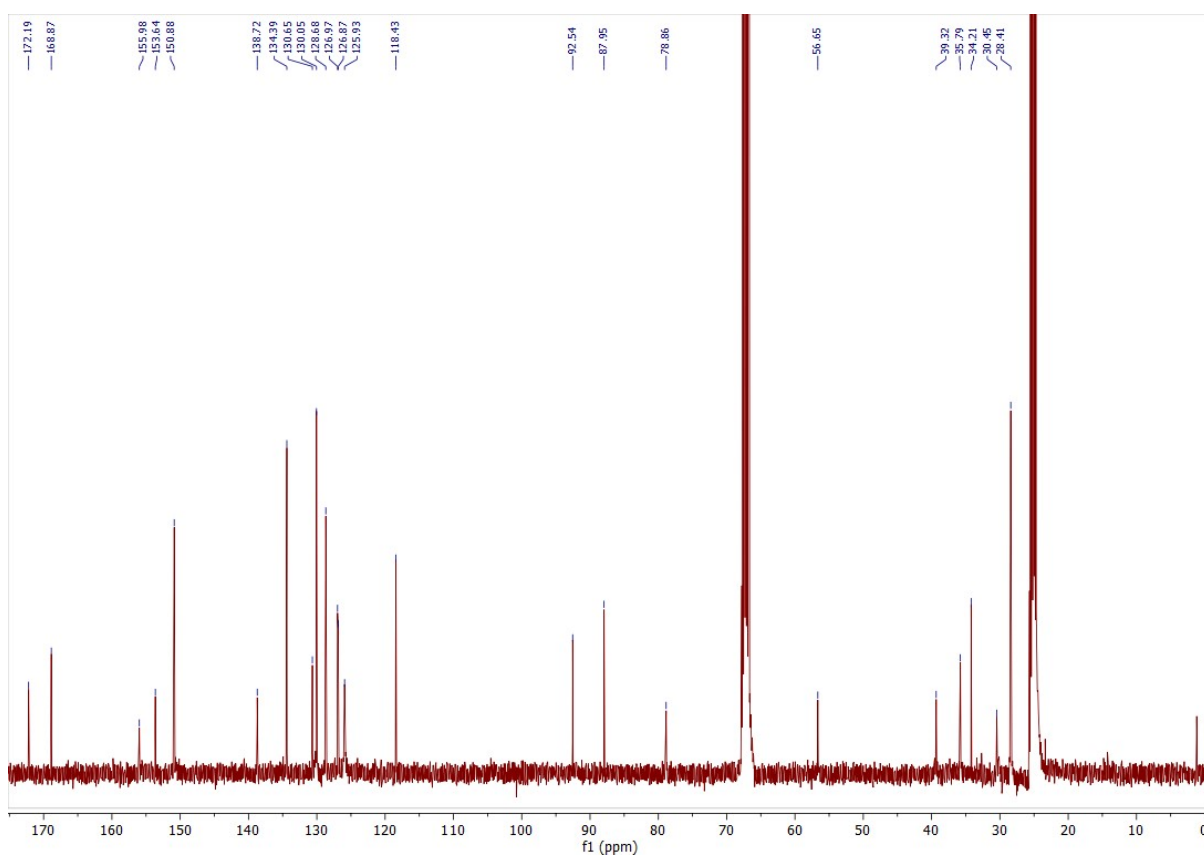

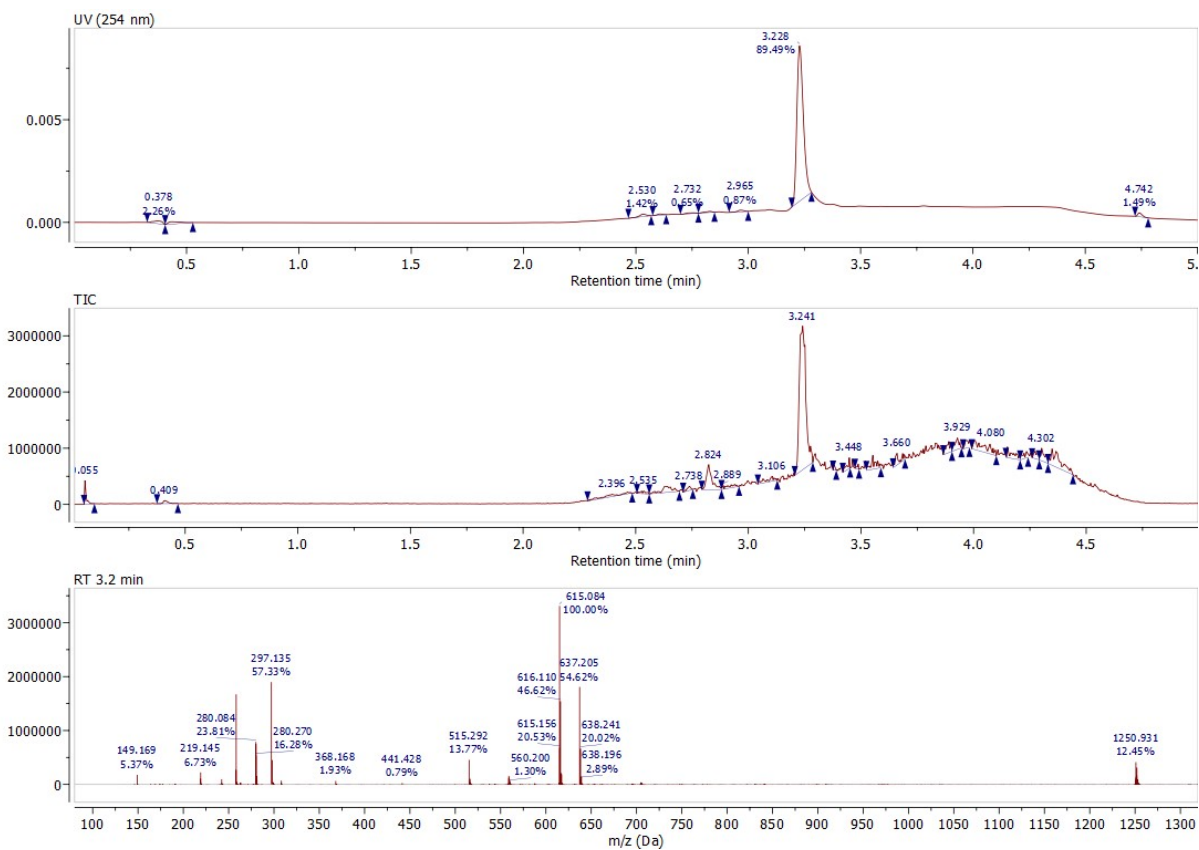

**Figure S10: LC-MS traces of compound 1b (top: UV (254 nm), middle: TIC, bottom: ESI spectrum at RT 3.2 min).**

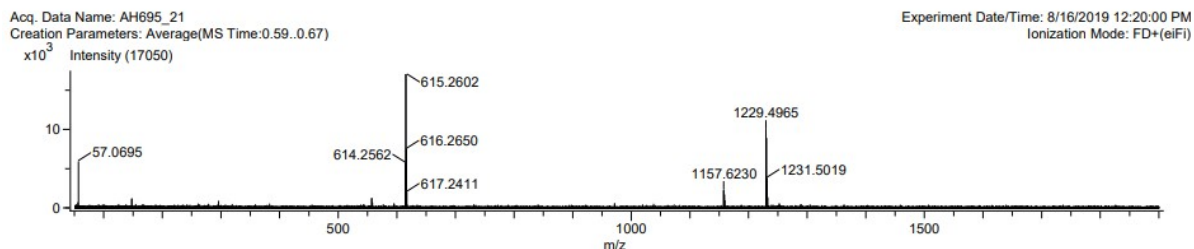

**Figure S11: HRMS of compound 1b.**

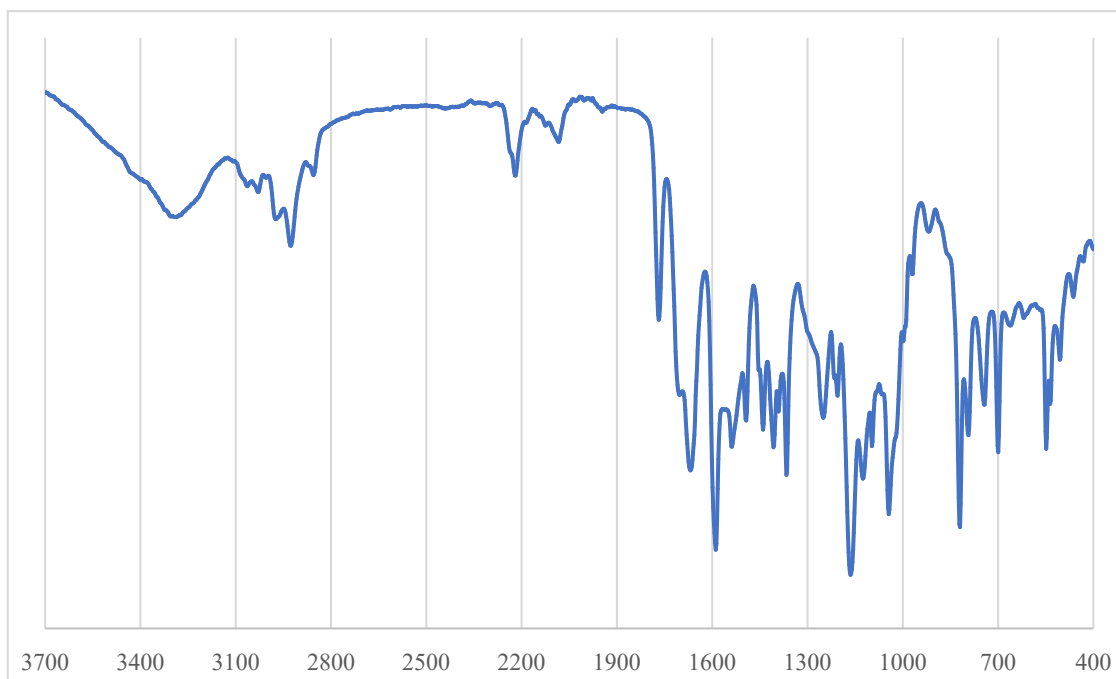

**Figure S12: IR spectrum of compound 1b.**

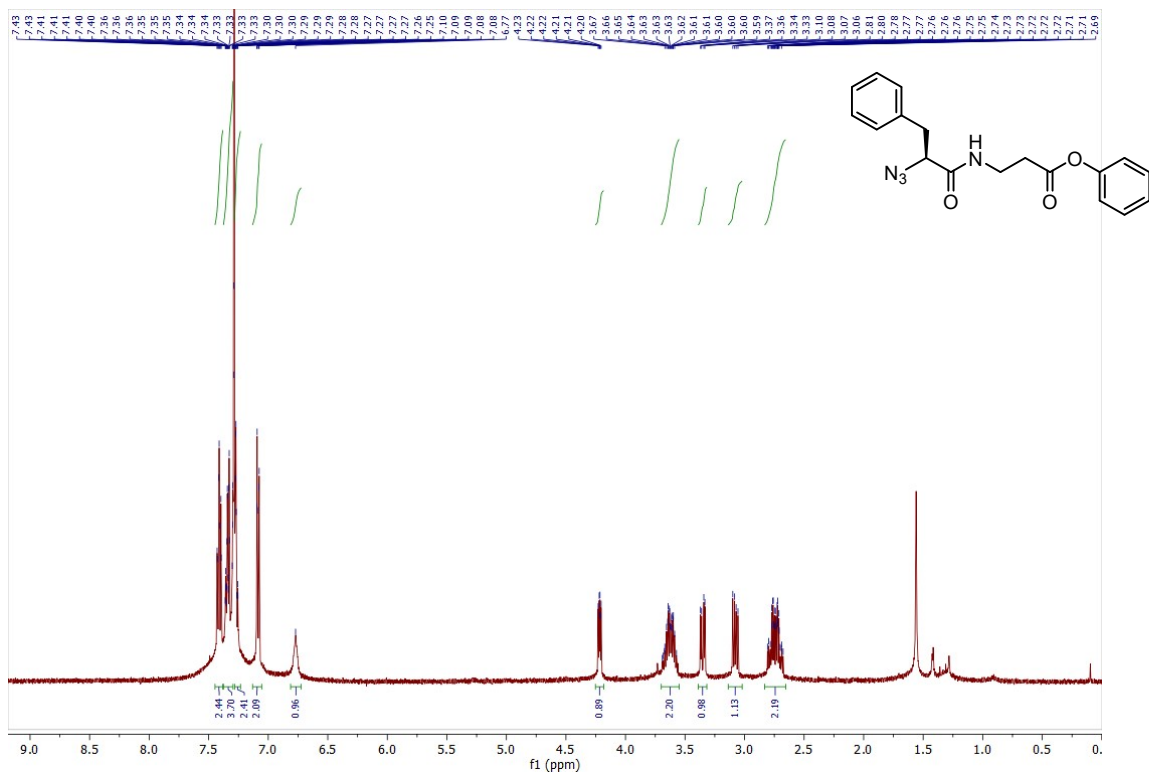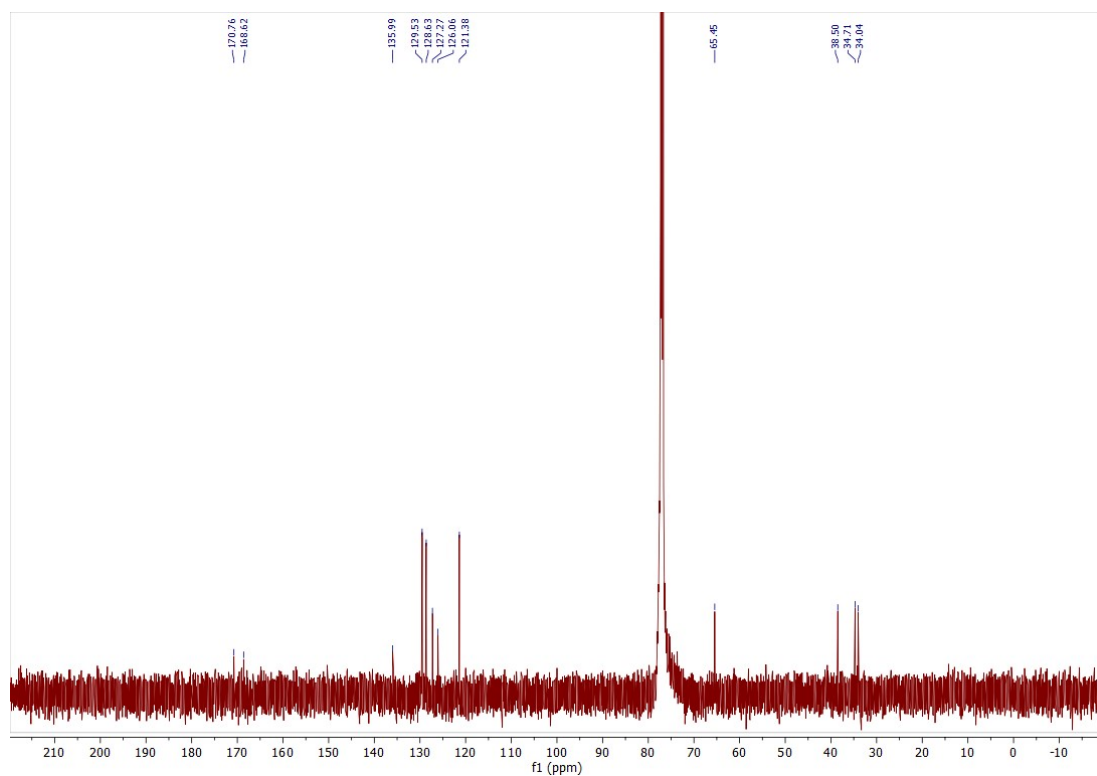

Acq. Data Name: DTFD\_AH682-2ndcolumn-fr18-33\_3  
Creation Parameters: Average(MS Time:0.06..0.09)

Experiment Date/Time: 8/1/2019 9:48:12 AM  
Ionization Mode: FD+(eiFI)

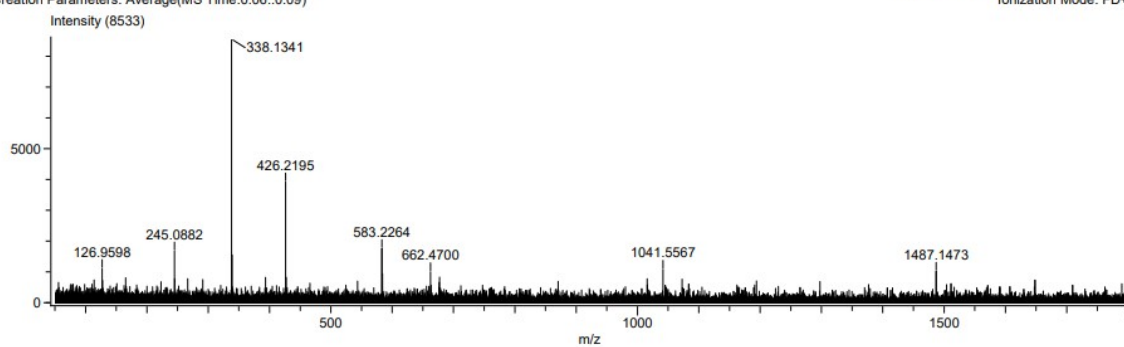

Figure S15: HRMS of compound 1c.

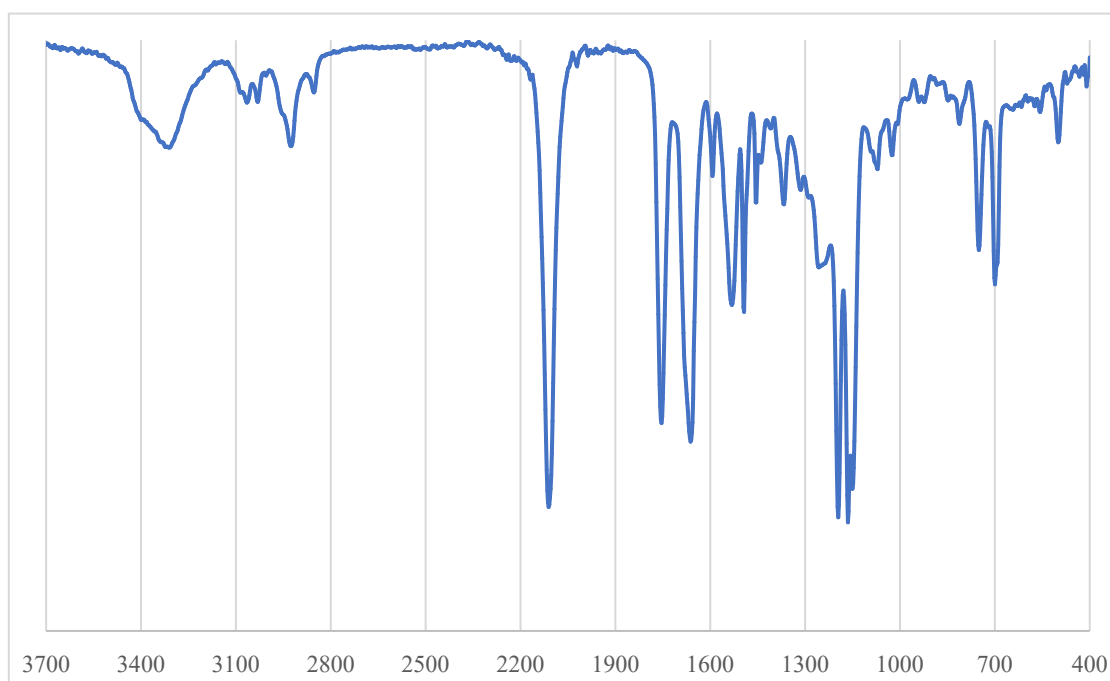

Figure S16: IR spectrum of compound 1c.

## Computational details

DFT studies were performed on full atomic models using TURBOMOLE 7.3<sup>[6]</sup> coupled to the PQS Baker optimiser<sup>[7]</sup> via the BOpt package.<sup>[8]</sup> All geometries were fully optimised as minima at the BP86<sup>[9]</sup> / def2-TZVP<sup>[10]</sup> level of theory on an m4 integration grid, using Grimme's zero damping dispersion corrections.<sup>[11]</sup> All minima contained no imaginary vibrations in the frequency analysis of the Hessian matrix. Energy output was reported in Hartree and was converted to kcal mol<sup>-1</sup> by multiplication with 627.5.

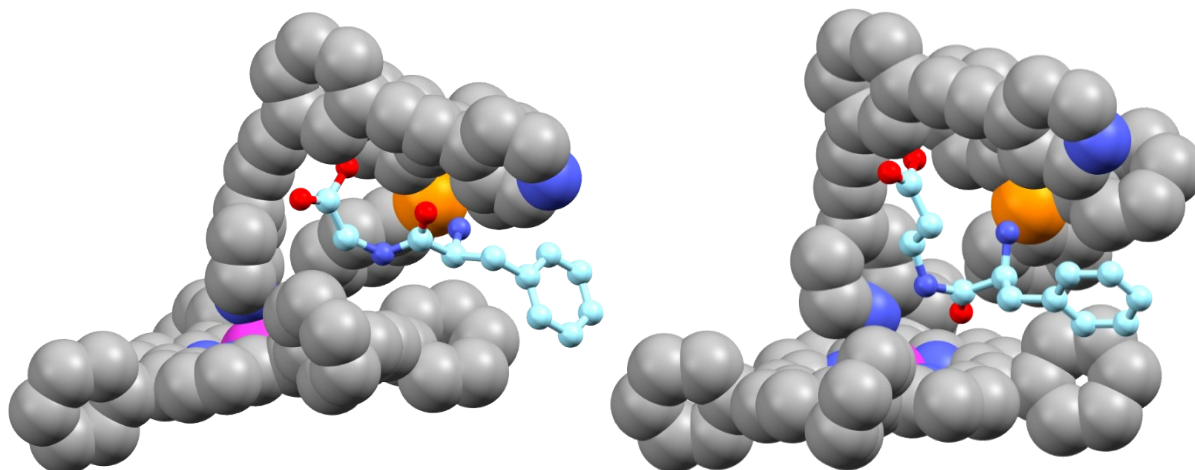

Figure S17: Calculated structures of transoid (A) and cisoid (B) isomers of iminophosphorane intermediate 3-ZnTPP (TurboMole, BP86, def2-TZVP).

Gibbs free energies of the calculated structures.

| Amide rotation     | Amide rotation | Energy (Eh) | N-C distance (Å) |
|--------------------|----------------|-------------|------------------|
| <b>3</b>           | Cisoid         | -2715.26250 | 6.18             |
| <b>3</b>           | Transoid       | -2715.25444 | 6.51             |
| <b>3-ZnTPP (2)</b> | Cisoid         | -6407.96363 | 4.07             |
| <b>3-ZnTPP (2)</b> | Transoid       | -6407.97517 | 6.38             |

### 3 cisoid xyz

-2715.26250 Eh

|   |           |           |           |
|---|-----------|-----------|-----------|
| H | 6.390000  | -2.936000 | -2.287000 |
| C | 5.438000  | -2.451000 | -2.071000 |
| C | 3.007000  | -1.209000 | -1.536000 |
| C | 4.414000  | -3.178000 | -1.465000 |
| C | 5.263000  | -1.106000 | -2.389000 |
| C | 4.037000  | -0.455000 | -2.123000 |
| C | 3.182000  | -2.561000 | -1.174000 |
| H | 4.558000  | -4.222000 | -1.190000 |
| H | 6.069000  | -0.531000 | -2.844000 |
| C | 2.151000  | -3.203000 | -0.447000 |
| C | 3.852000  | 0.924000  | -2.389000 |
| C | 1.235000  | -3.606000 | 0.253000  |
| C | 3.719000  | 2.121000  | -2.589000 |
| C | 0.179000  | -4.005000 | 1.109000  |
| C | -0.546000 | -3.043000 | 1.843000  |
| C | -0.189000 | -5.355000 | 1.276000  |
| C | -1.236000 | -5.662000 | 2.145000  |
| C | -1.573000 | -3.464000 | 2.684000  |
| H | -0.294000 | -1.987000 | 1.768000  |
| H | 0.335000  | -6.140000 | 0.732000  |
| H | -1.536000 | -6.704000 | 2.286000  |
| H | -2.133000 | -2.727000 | 3.264000  |
| C | 3.603000  | 3.511000  | -2.851000 |
| C | 2.726000  | 4.332000  | -2.117000 |
| C | 4.377000  | 4.118000  | -3.863000 |
| C | 4.234000  | 5.485000  | -4.088000 |
| C | 2.670000  | 5.690000  | -2.431000 |
| H | 2.102000  | 3.937000  | -1.312000 |
| H | 5.069000  | 3.523000  | -4.459000 |
| H | 4.823000  | 5.973000  | -4.870000 |
| H | 1.995000  | 6.343000  | -1.871000 |
| N | -1.929000 | -4.750000 | 2.847000  |
| N | 3.399000  | 6.278000  | -3.395000 |
| O | 1.827000  | -0.576000 | -1.205000 |
| C | 0.659000  | -0.992000 | -1.850000 |
| O | 0.659000  | -1.653000 | -2.855000 |
| C | -0.560000 | -0.514000 | -1.097000 |
| H | -1.116000 | -1.432000 | -0.850000 |
| H | -1.189000 | 0.052000  | -1.800000 |
| C | -0.294000 | 0.283000  | 0.178000  |
| H | 0.414000  | -0.271000 | 0.815000  |
| H | -1.235000 | 0.369000  | 0.733000  |
| N | 0.217000  | 1.617000  | -0.102000 |
| H | 1.029000  | 1.656000  | -0.720000 |
| C | 0.029000  | 2.771000  | 0.619000  |
| C | -0.943000 | 2.724000  | 1.810000  |
| H | -1.615000 | 1.853000  | 1.699000  |
| O | 0.657000  | 3.795000  | 0.339000  |
| N | -0.178000 | 2.694000  | 3.037000  |
| C | -1.869000 | 3.965000  | 1.807000  |
| H | -2.326000 | 4.068000  | 0.810000  |

|   |           |           |          |
|---|-----------|-----------|----------|
| H | -1.248000 | 4.852000  | 1.988000 |
| C | -2.924000 | 3.777000  | 2.863000 |
| C | -4.752000 | 3.119000  | 4.909000 |
| C | -2.706000 | 4.194000  | 4.184000 |
| C | -4.087000 | 3.042000  | 2.583000 |
| C | -4.996000 | 2.715000  | 3.593000 |
| C | -3.607000 | 3.867000  | 5.199000 |
| H | -1.808000 | 4.770000  | 4.409000 |
| H | -4.274000 | 2.711000  | 1.558000 |
| H | -5.894000 | 2.145000  | 3.353000 |
| H | -3.412000 | 4.190000  | 6.223000 |
| H | -5.454000 | 2.859000  | 5.702000 |
| P | 0.506000  | 1.489000  | 3.774000 |
| C | 1.349000  | 2.169000  | 5.234000 |
| C | 2.542000  | 3.206000  | 7.542000 |
| C | 2.463000  | 1.531000  | 5.797000 |
| C | 0.836000  | 3.331000  | 5.828000 |
| C | 1.435000  | 3.847000  | 6.977000 |
| C | 3.056000  | 2.049000  | 6.950000 |
| H | 2.884000  | 0.643000  | 5.322000 |
| H | -0.020000 | 3.821000  | 5.366000 |
| H | 1.038000  | 4.756000  | 7.433000 |
| H | 3.928000  | 1.554000  | 7.381000 |
| H | 3.010000  | 3.613000  | 8.440000 |
| C | -0.632000 | 0.220000  | 4.466000 |
| C | -2.513000 | -1.506000 | 5.639000 |
| C | -2.005000 | 0.406000  | 4.243000 |
| C | -0.213000 | -0.825000 | 5.308000 |
| C | -1.148000 | -1.686000 | 5.884000 |
| C | -2.939000 | -0.455000 | 4.823000 |
| H | -2.351000 | 1.258000  | 3.657000 |
| H | 0.844000  | -0.947000 | 5.548000 |
| H | -0.812000 | -2.494000 | 6.535000 |
| H | -4.002000 | -0.285000 | 4.647000 |
| H | -3.241000 | -2.180000 | 6.091000 |
| C | 1.833000  | 0.612000  | 2.854000 |
| C | 3.965000  | -0.475000 | 1.389000 |
| C | 2.650000  | 1.441000  | 2.063000 |
| C | 2.083000  | -0.769000 | 2.884000 |
| C | 3.149000  | -1.307000 | 2.158000 |
| C | 3.704000  | 0.898000  | 1.330000 |
| H | 2.436000  | 2.511000  | 2.012000 |
| H | 1.443000  | -1.435000 | 3.462000 |
| H | 3.329000  | -2.382000 | 2.181000 |
| H | 4.316000  | 1.545000  | 0.701000 |
| H | 4.791000  | -0.899000 | 0.816000 |



**3 transoid xyz**

-2715.25444 Eh

C 6.991000 0.214000 -2.951000  
H 8.021000 0.238000 -3.306000  
C 4.351000 0.147000 -2.078000  
C 6.447000 -0.986000 -2.495000  
C 6.241000 1.390000 -2.933000  
C 4.904000 1.378000 -2.483000  
C 5.115000 -1.036000 -2.039000  
H 7.044000 -1.898000 -2.478000  
H 6.677000 2.334000 -3.257000  
C 4.522000 -2.191000 -1.471000  
C 4.104000 2.539000 -2.347000  
C 3.908000 -3.070000 -0.889000  
C 3.324000 3.438000 -2.078000  
C 3.164000 -4.027000 -0.156000  
C 1.756000 -4.070000 -0.241000  
C 3.785000 -4.937000 0.724000  
C 2.988000 -5.810000 1.462000  
C 1.060000 -4.983000 0.549000  
H 1.226000 -3.395000 -0.912000  
H 4.869000 -4.944000 0.830000  
H 3.453000 -6.518000 2.154000  
H -0.032000 -5.018000 0.508000  
C 2.361000 4.393000 -1.667000  
C 1.087000 3.958000 -1.248000  
C 2.628000 5.775000 -1.609000  
C 1.633000 6.628000 -1.131000  
C 0.170000 4.901000 -0.789000  
H 0.813000 2.904000 -1.261000  
H 3.595000 6.167000 -1.923000  
H 1.822000 7.704000 -1.072000  
H -0.816000 4.564000 -0.458000  
N 1.646000 -5.847000 1.395000  
N 0.421000 6.221000 -0.718000  
O 3.055000 0.142000 -1.599000  
C 2.065000 -0.443000 -2.394000  
O 2.283000 -0.903000 -3.485000  
C 0.734000 -0.373000 -1.693000  
H 0.165000 -1.271000 -1.971000  
H 0.186000 0.486000 -2.111000  
C 0.829000 -0.209000 -0.174000  
H 1.399000 0.704000 0.058000  
H 1.376000 -1.057000 0.261000  
N -0.470000 -0.138000 0.479000  
H -0.609000 -0.679000 1.333000  
C -1.224000 0.994000 0.418000  
C -2.246000 1.140000 1.580000  
H -3.153000 0.592000 1.258000  
O -1.073000 1.855000 -0.457000  
N -1.784000 0.497000 2.773000  
C -2.654000 2.638000 1.698000  
H -3.278000 2.887000 0.827000

H -1.759000 3.269000 1.611000  
C -3.365000 2.968000 2.982000  
C -4.664000 3.604000 5.401000  
C -2.727000 3.742000 3.961000  
C -4.664000 2.508000 3.240000  
C -5.310000 2.822000 4.437000  
C -3.368000 4.062000 5.160000  
H -1.709000 4.094000 3.781000  
H -5.175000 1.899000 2.491000  
H -6.322000 2.458000 4.620000  
H -2.846000 4.653000 5.914000  
H -5.165000 3.844000 6.339000  
P -0.631000 0.633000 3.819000  
C 0.869000 1.649000 3.499000  
C 3.216000 3.096000 2.943000  
C 2.027000 1.464000 4.278000  
C 0.912000 2.559000 2.433000  
C 2.078000 3.278000 2.156000  
C 3.188000 2.187000 4.006000  
H 2.028000 0.728000 5.084000  
H 0.045000 2.707000 1.793000  
H 2.091000 3.970000 1.313000  
H 4.078000 2.031000 4.617000  
H 4.128000 3.652000 2.722000  
C -1.278000 1.130000 5.457000  
C -2.435000 1.776000 7.928000  
C -2.603000 0.758000 5.740000  
C -0.545000 1.844000 6.415000  
C -1.126000 2.172000 7.642000  
C -3.173000 1.072000 6.972000  
H -3.188000 0.263000 4.963000  
H 0.472000 2.173000 6.200000  
H -0.554000 2.742000 8.376000  
H -4.206000 0.789000 7.176000  
H -2.887000 2.034000 8.887000  
C 0.067000 -1.048000 4.042000  
C 0.845000 -3.749000 4.009000  
C 1.133000 -1.476000 3.229000  
C -0.584000 -1.984000 4.860000  
C -0.196000 -3.326000 4.841000  
C 1.516000 -2.817000 3.212000  
H 1.668000 -0.755000 2.610000  
H -1.402000 -1.664000 5.506000  
H -0.715000 -4.047000 5.474000  
H 2.337000 -3.140000 2.569000  
H 1.128000 -4.801000 3.967000

**3 cisoid ZnTPP xyz**

-6407.96363 Eh

|   |           |            |           |
|---|-----------|------------|-----------|
| H | 7.588000  | 0.844000   | -2.601000 |
| C | 6.552000  | 0.623000   | -2.344000 |
| C | 3.906000  | 0.057000   | -1.705000 |
| C | 6.166000  | -0.700000  | -2.124000 |
| C | 5.635000  | 1.667000   | -2.221000 |
| C | 4.294000  | 1.402000   | -1.883000 |
| C | 4.830000  | -1.004000  | -1.797000 |
| H | 6.890000  | -1.511000  | -2.197000 |
| H | 5.947000  | 2.701000   | -2.364000 |
| C | 4.365000  | -2.315000  | -1.498000 |
| C | 3.332000  | 2.396000   | -1.585000 |
| C | 3.822000  | -3.359000  | -1.172000 |
| C | 2.410000  | 3.070000   | -1.155000 |
| C | 2.954000  | -4.425000  | -0.806000 |
| C | 2.253000  | -5.154000  | -1.789000 |
| C | 2.624000  | -4.678000  | 0.541000  |
| C | 1.565000  | -5.532000  | 0.833000  |
| C | 1.221000  | -6.002000  | -1.399000 |
| H | 2.478000  | -5.013000  | -2.845000 |
| H | 3.154000  | -4.166000  | 1.342000  |
| H | 1.225000  | -5.703000  | 1.855000  |
| H | 0.633000  | -6.551000  | -2.135000 |
| C | 1.341000  | 3.767000   | -0.541000 |
| C | 0.368000  | 3.059000   | 0.200000  |
| C | 1.220000  | 5.170000   | -0.596000 |
| C | 0.169000  | 5.782000   | 0.084000  |
| C | -0.627000 | 3.780000   | 0.857000  |
| H | 0.402000  | 1.971000   | 0.284000  |
| H | 1.942000  | 5.762000   | -1.158000 |
| H | 0.058000  | 6.869000   | 0.049000  |
| H | -1.365000 | 3.249000   | 1.461000  |
| N | 0.851000  | -6.162000  | -0.115000 |
| N | -0.746000 | 5.119000   | 0.812000  |
| C | 0.895000  | -9.350000  | 1.889000  |
| C | 1.873000  | -10.380000 | 1.595000  |
| C | 1.729000  | -10.699000 | 0.274000  |
| C | 0.678000  | -9.853000  | -0.254000 |
| N | 0.186000  | -9.052000  | 0.749000  |
| C | 0.719000  | -8.737000  | 3.149000  |
| C | 0.310000  | -9.801000  | -1.616000 |
| C | -0.580000 | -8.872000  | -2.196000 |
| C | -0.816000 | -8.728000  | -3.618000 |
| C | -1.622000 | -7.634000  | -3.782000 |
| C | -1.928000 | -7.132000  | -2.458000 |
| N | -1.284000 | -7.903000  | -1.517000 |
| C | -2.737000 | -6.009000  | -2.174000 |
| C | -3.091000 | -5.569000  | -0.879000 |
| C | -4.053000 | -4.520000  | -0.608000 |
| C | -4.126000 | -4.389000  | 0.749000  |
| C | -3.201000 | -5.348000  | 1.319000  |
| N | -2.604000 | -6.063000  | 0.307000  |

|   |           |            |           |
|---|-----------|------------|-----------|
| C | -2.862000 | -5.417000  | 2.686000  |
| C | -1.865000 | -6.251000  | 3.233000  |
| C | -1.594000 | -6.386000  | 4.647000  |
| C | -0.582000 | -7.296000  | 4.778000  |
| C | -0.232000 | -7.733000  | 3.443000  |
| N | -1.023000 | -7.079000  | 2.525000  |
| H | 2.588000  | -10.791000 | 2.300000  |
| H | 2.299000  | -11.424000 | -0.298000 |
| H | -0.411000 | -9.371000  | -4.392000 |
| H | -1.979000 | -7.213000  | -4.716000 |
| H | -4.610000 | -3.968000  | -1.358000 |
| H | -4.738000 | -3.691000  | 1.310000  |
| H | -2.127000 | -5.869000  | 5.438000  |
| H | -0.139000 | -7.670000  | 5.696000  |
| C | -3.497000 | -4.426000  | 3.600000  |
| C | -4.628000 | -2.470000  | 5.286000  |
| C | -2.690000 | -3.457000  | 4.223000  |
| C | -4.881000 | -4.399000  | 3.838000  |
| C | -5.441000 | -3.428000  | 4.672000  |
| C | -3.249000 | -2.489000  | 5.058000  |
| H | -1.620000 | -3.465000  | 4.022000  |
| H | -5.515000 | -5.150000  | 3.366000  |
| H | -6.518000 | -3.424000  | 4.848000  |
| H | -2.602000 | -1.738000  | 5.513000  |
| C | -3.242000 | -5.197000  | -3.317000 |
| C | -4.162000 | -3.613000  | -5.456000 |
| C | -2.831000 | -3.858000  | -3.448000 |
| C | -4.129000 | -5.724000  | -4.269000 |
| C | -4.584000 | -4.939000  | -5.330000 |
| C | -3.286000 | -3.074000  | -4.510000 |
| H | -2.156000 | -3.435000  | -2.700000 |
| H | -4.469000 | -6.755000  | -4.161000 |
| H | -5.279000 | -5.363000  | -6.057000 |
| H | -2.954000 | -2.038000  | -4.599000 |
| C | 0.972000  | -10.781000 | -2.529000 |
| C | 2.227000  | -12.641000 | -4.231000 |
| C | 0.643000  | -12.144000 | -2.467000 |
| C | 1.943000  | -10.365000 | -3.454000 |
| C | 2.565000  | -11.286000 | -4.299000 |
| C | 1.264000  | -13.067000 | -3.312000 |
| H | -0.109000 | -12.473000 | -1.749000 |
| H | 2.210000  | -9.308000  | -3.500000 |
| H | 3.321000  | -10.946000 | -5.009000 |
| H | 0.992000  | -14.122000 | -3.253000 |
| C | 1.572000  | -9.200000  | 4.280000  |
| C | 3.179000  | -10.040000 | 6.439000  |
| C | 2.449000  | -8.305000  | 4.916000  |
| C | 1.512000  | -10.523000 | 4.748000  |
| C | 2.308000  | -10.939000 | 5.817000  |
| C | 3.246000  | -8.720000  | 5.985000  |
| H | 2.504000  | -7.275000  | 4.559000  |
| H | 0.823000  | -11.221000 | 4.270000  |
| H | 2.241000  | -11.969000 | 6.171000  |

|    |           |            |           |   |           |           |          |
|----|-----------|------------|-----------|---|-----------|-----------|----------|
| H  | 3.926000  | -8.011000  | 6.461000  | C | -1.569000 | 2.617000  | 4.401000 |
| Zn | -0.963000 | -7.331000  | 0.465000  | H | -1.812000 | 1.054000  | 2.931000 |
| H  | 3.800000  | -10.366000 | 7.274000  | H | 2.117000  | 1.412000  | 4.675000 |
| H  | -5.067000 | -1.712000  | 5.935000  | H | 1.333000  | 3.324000  | 6.047000 |
| H  | -4.519000 | -3.000000  | -6.285000 | H | -2.604000 | 2.947000  | 4.313000 |
| H  | 2.712000  | -13.361000 | -4.891000 | H | -1.026000 | 4.104000  | 5.871000 |
| O  | 2.623000  | -0.246000  | -1.319000 | C | 0.724000  | -1.711000 | 3.922000 |
| C  | 1.584000  | -0.131000  | -2.259000 | C | 0.649000  | -3.897000 | 5.691000 |
| O  | 1.744000  | 0.321000   | -3.363000 | C | 1.016000  | -3.012000 | 3.472000 |
| C  | 0.342000  | -0.719000  | -1.655000 | C | 0.384000  | -1.525000 | 5.272000 |
| H  | -0.458000 | -0.696000  | -2.404000 | C | 0.350000  | -2.612000 | 6.149000 |
| H  | 0.063000  | -0.131000  | -0.765000 | C | 0.980000  | -4.094000 | 4.349000 |
| C  | 0.671000  | -2.144000  | -1.188000 | H | 1.214000  | -3.188000 | 2.418000 |
| H  | 1.479000  | -2.070000  | -0.449000 | H | 0.131000  | -0.531000 | 5.639000 |
| H  | 1.062000  | -2.710000  | -2.045000 | H | 0.070000  | -2.454000 | 7.191000 |
| N  | -0.430000 | -2.950000  | -0.646000 | H | 1.156000  | -5.106000 | 3.982000 |
| H  | -0.308000 | -3.938000  | -0.880000 | H | 0.592000  | -4.752000 | 6.365000 |
| C  | -0.809000 | -2.883000  | 0.694000  |   |           |           |          |
| C  | -1.260000 | -1.546000  | 1.294000  |   |           |           |          |
| H  | -1.662000 | -1.837000  | 2.279000  |   |           |           |          |
| O  | -0.857000 | -3.910000  | 1.368000  |   |           |           |          |
| N  | -0.155000 | -0.599000  | 1.392000  |   |           |           |          |
| C  | -2.455000 | -1.020000  | 0.454000  |   |           |           |          |
| H  | -3.083000 | -1.892000  | 0.209000  |   |           |           |          |
| H  | -2.084000 | -0.619000  | -0.497000 |   |           |           |          |
| C  | -3.275000 | 0.007000   | 1.182000  |   |           |           |          |
| C  | -4.735000 | 1.923000   | 2.640000  |   |           |           |          |
| C  | -3.277000 | 1.353000   | 0.793000  |   |           |           |          |
| C  | -4.027000 | -0.369000  | 2.307000  |   |           |           |          |
| C  | -4.746000 | 0.580000   | 3.034000  |   |           |           |          |
| C  | -4.002000 | 2.307000   | 1.515000  |   |           |           |          |
| H  | -2.691000 | 1.658000   | -0.075000 |   |           |           |          |
| H  | -4.034000 | -1.412000  | 2.629000  |   |           |           |          |
| H  | -5.314000 | 0.266000   | 3.911000  |   |           |           |          |
| H  | -3.982000 | 3.353000   | 1.203000  |   |           |           |          |
| H  | -5.298000 | 2.666000   | 3.207000  |   |           |           |          |
| P  | 0.698000  | -0.338000  | 2.702000  |   |           |           |          |
| C  | 2.425000  | 0.014000   | 2.222000  |   |           |           |          |
| C  | 5.038000  | 0.541000   | 1.334000  |   |           |           |          |
| C  | 3.347000  | -1.031000  | 2.053000  |   |           |           |          |
| C  | 2.830000  | 1.327000   | 1.938000  |   |           |           |          |
| C  | 4.130000  | 1.588000   | 1.501000  |   |           |           |          |
| C  | 4.643000  | -0.770000  | 1.611000  |   |           |           |          |
| H  | 3.058000  | -2.056000  | 2.279000  |   |           |           |          |
| H  | 2.132000  | 2.155000   | 2.059000  |   |           |           |          |
| H  | 4.423000  | 2.611000   | 1.269000  |   |           |           |          |
| H  | 5.342000  | -1.595000  | 1.469000  |   |           |           |          |
| H  | 6.045000  | 0.743000   | 0.967000  |   |           |           |          |
| C  | 0.201000  | 1.112000   | 3.705000  |   |           |           |          |
| C  | -0.685000 | 3.260000   | 5.270000  |   |           |           |          |
| C  | -1.127000 | 1.546000   | 3.620000  |   |           |           |          |
| C  | 1.083000  | 1.752000   | 4.593000  |   |           |           |          |
| C  | 0.641000  | 2.824000   | 5.367000  |   |           |           |          |

**3 transoid ZnTPP xyz**

-6407.97517 Eh

H 6.957000 1.383000 -2.899000  
C 5.986000 0.945000 -2.669000  
C 3.493000 -0.177000 -2.092000  
C 5.913000 -0.364000 -2.194000  
C 4.829000 1.702000 -2.837000  
C 3.561000 1.159000 -2.539000  
C 4.665000 -0.942000 -1.895000  
H 6.816000 -0.954000 -2.041000  
H 4.884000 2.733000 -3.183000  
C 4.507000 -2.246000 -1.367000  
C 2.377000 1.934000 -2.593000  
C 4.121000 -3.314000 -0.922000  
C 1.342000 2.576000 -2.532000  
C 3.325000 -4.456000 -0.652000  
C 2.556000 -4.973000 -1.716000  
C 3.114000 -4.992000 0.634000  
C 2.089000 -5.917000 0.808000  
C 1.553000 -5.888000 -1.438000  
H 2.692000 -4.586000 -2.725000  
H 3.693000 -4.640000 1.487000  
H 1.848000 -6.336000 1.786000  
H 0.898000 -6.269000 -2.221000  
C 0.132000 3.305000 -2.399000  
C -0.865000 2.873000 -1.501000  
C -0.113000 4.480000 -3.138000  
C -1.320000 5.151000 -2.947000  
C -2.031000 3.630000 -1.393000  
H -0.720000 1.971000 -0.902000  
H 0.628000 4.854000 -3.845000  
H -1.531000 6.064000 -3.512000  
H -2.817000 3.316000 -0.700000  
N 1.290000 -6.323000 -0.193000  
N -2.277000 4.751000 -2.094000  
C 0.662000 -9.547000 1.801000  
C 1.484000 -10.725000 1.604000  
C 1.398000 -11.053000 0.281000  
C 0.541000 -10.067000 -0.347000  
N 0.115000 -9.165000 0.598000  
C 0.444000 -8.899000 3.037000  
C 0.259000 -10.017000 -1.732000  
C -0.416000 -8.968000 -2.394000  
C -0.645000 -8.894000 -3.824000  
C -1.213000 -7.676000 -4.077000  
C -1.366000 -7.010000 -2.801000  
N -0.896000 -7.826000 -1.797000  
C -1.886000 -5.713000 -2.625000  
C -2.158000 -5.099000 -1.385000  
C -2.808000 -3.815000 -1.231000  
C -2.966000 -3.609000 0.110000  
C -2.386000 -4.752000 0.791000  
N -1.892000 -5.633000 -0.145000

C -2.308000 -4.914000 2.197000  
C -1.628000 -5.972000 2.847000  
C -1.654000 -6.219000 4.272000  
C -0.855000 -7.303000 4.508000  
C -0.357000 -7.748000 3.225000  
N -0.848000 -6.930000 2.233000  
H 2.063000 -11.226000 2.373000  
H 1.889000 -11.875000 -0.231000  
H -0.407000 -9.674000 -4.540000  
H -1.518000 -7.267000 -5.035000  
H -3.110000 -3.161000 -2.042000  
H -3.407000 -2.743000 0.593000  
H -2.223000 -5.650000 4.998000  
H -0.658000 -7.786000 5.459000  
C -2.971000 -3.888000 3.050000  
C -4.148000 -1.835000 4.589000  
C -2.239000 -3.208000 4.039000  
C -4.325000 -3.544000 2.876000  
C -4.902000 -2.526000 3.635000  
C -2.816000 -2.191000 4.798000  
H -1.193000 -3.465000 4.184000  
H -4.920000 -4.081000 2.135000  
H -5.946000 -2.257000 3.473000  
H -2.205000 -1.651000 5.520000  
C -2.151000 -4.906000 -3.855000  
C -2.604000 -3.321000 -6.133000  
C -1.080000 -4.298000 -4.527000  
C -3.452000 -4.715000 -4.343000  
C -3.677000 -3.929000 -5.476000  
C -1.304000 -3.506000 -5.656000  
H -0.064000 -4.434000 -4.153000  
H -4.287000 -5.187000 -3.822000  
H -4.694000 -3.791000 -5.845000  
H -0.459000 -3.029000 -6.155000  
C 0.763000 -11.147000 -2.565000  
C 1.715000 -13.291000 -4.124000  
C 0.249000 -12.443000 -2.393000  
C 1.764000 -10.944000 -3.529000  
C 2.236000 -12.006000 -4.302000  
C 0.719000 -13.505000 -3.166000  
H -0.530000 -12.607000 -1.647000  
H 2.175000 -9.942000 -3.661000  
H 3.019000 -11.831000 -5.042000  
H 0.304000 -14.504000 -3.024000  
C 1.066000 -9.479000 4.258000  
C 2.243000 -10.527000 6.596000  
C 1.951000 -8.705000 5.030000  
C 0.778000 -10.787000 4.684000  
C 1.362000 -11.306000 5.841000  
C 2.536000 -9.223000 6.186000  
H 2.181000 -7.688000 4.706000  
H 0.078000 -11.389000 4.103000  
H 1.119000 -12.321000 6.160000

|    |           |            |           |   |           |           |          |
|----|-----------|------------|-----------|---|-----------|-----------|----------|
| H  | 3.227000  | -8.608000  | 6.766000  | C | -0.228000 | 2.044000  | 7.009000 |
| Zn | -0.645000 | -7.277000  | 0.192000  | H | -1.361000 | 0.942000  | 5.521000 |
| H  | 2.699000  | -10.933000 | 7.500000  | H | 2.916000  | 0.908000  | 5.023000 |
| H  | -4.593000 | -1.006000  | 5.139000  | H | 3.171000  | 2.330000  | 7.045000 |
| H  | -2.781000 | -2.702000  | -7.014000 | H | -1.111000 | 2.364000  | 7.564000 |
| H  | 2.083000  | -14.121000 | -4.728000 | H | 1.160000  | 3.060000  | 8.320000 |
| O  | 2.264000  | -0.658000  | -1.701000 | C | 0.905000  | -1.932000 | 4.368000 |
| C  | 1.668000  | -1.727000  | -2.362000 | C | 1.104000  | -4.547000 | 5.400000 |
| O  | 2.099000  | -2.195000  | -3.390000 | C | 1.218000  | -3.015000 | 3.525000 |
| C  | 0.428000  | -2.147000  | -1.615000 | C | 0.706000  | -2.184000 | 5.736000 |
| H  | -0.009000 | -3.011000  | -2.127000 | C | 0.807000  | -3.479000 | 6.248000 |
| H  | -0.271000 | -1.302000  | -1.688000 | C | 1.309000  | -4.309000 | 4.039000 |
| C  | 0.688000  | -2.435000  | -0.113000 | H | 1.375000  | -2.851000 | 2.459000 |
| H  | 1.627000  | -1.946000  | 0.190000  | H | 0.465000  | -1.360000 | 6.408000 |
| H  | 0.798000  | -3.514000  | 0.040000  | H | 0.643000  | -3.653000 | 7.313000 |
| N  | -0.369000 | -1.989000  | 0.779000  | H | 1.501000  | -5.147000 | 3.371000 |
| H  | -0.859000 | -2.680000  | 1.340000  | H | 1.151000  | -5.565000 | 5.786000 |
| C  | -0.748000 | -0.687000  | 0.867000  |   |           |           |          |
| C  | -1.676000 | -0.355000  | 2.040000  |   |           |           |          |
| H  | -2.282000 | -1.250000  | 2.287000  |   |           |           |          |
| O  | -0.291000 | 0.176000   | 0.107000  |   |           |           |          |
| N  | -0.908000 | 0.063000   | 3.188000  |   |           |           |          |
| C  | -2.642000 | 0.771000   | 1.597000  |   |           |           |          |
| H  | -3.129000 | 0.455000   | 0.661000  |   |           |           |          |
| H  | -2.023000 | 1.648000   | 1.359000  |   |           |           |          |
| C  | -3.683000 | 1.108000   | 2.629000  |   |           |           |          |
| C  | -5.617000 | 1.668000   | 4.605000  |   |           |           |          |
| C  | -3.352000 | 1.866000   | 3.764000  |   |           |           |          |
| C  | -5.002000 | 0.654000   | 2.496000  |   |           |           |          |
| C  | -5.965000 | 0.935000   | 3.469000  |   |           |           |          |
| C  | -4.305000 | 2.134000   | 4.748000  |   |           |           |          |
| H  | -2.333000 | 2.237000   | 3.866000  |   |           |           |          |
| H  | -5.276000 | 0.062000   | 1.620000  |   |           |           |          |
| H  | -6.987000 | 0.574000   | 3.342000  |   |           |           |          |
| H  | -4.027000 | 2.721000   | 5.625000  |   |           |           |          |
| H  | -6.365000 | 1.886000   | 5.370000  |   |           |           |          |
| P  | 0.541000  | -0.248000  | 3.707000  |   |           |           |          |
| C  | 1.945000  | 0.136000   | 2.594000  |   |           |           |          |
| C  | 4.015000  | 0.925000   | 0.874000  |   |           |           |          |
| C  | 3.145000  | -0.592000  | 2.548000  |   |           |           |          |
| C  | 1.794000  | 1.262000   | 1.768000  |   |           |           |          |
| C  | 2.824000  | 1.655000   | 0.916000  |   |           |           |          |
| C  | 4.172000  | -0.203000  | 1.683000  |   |           |           |          |
| H  | 3.286000  | -1.459000  | 3.194000  |   |           |           |          |
| H  | 0.851000  | 1.809000   | 1.781000  |   |           |           |          |
| H  | 2.686000  | 2.516000   | 0.262000  |   |           |           |          |
| H  | 5.094000  | -0.783000  | 1.640000  |   |           |           |          |
| H  | 4.815000  | 1.225000   | 0.195000  |   |           |           |          |
| C  | 0.757000  | 0.835000   | 5.154000  |   |           |           |          |
| C  | 1.047000  | 2.433000   | 7.434000  |   |           |           |          |
| C  | -0.376000 | 1.248000   | 5.873000  |   |           |           |          |
| C  | 2.033000  | 1.222000   | 5.584000  |   |           |           |          |
| C  | 2.176000  | 2.022000   | 6.720000  |   |           |           |          |

## References

- [1] G. R. Fulmer, A. J. M. Miller, N. H. Sherden, H. E. Gottlieb, A. Nudelman, B. M. Stoltz, J. E. Bercaw, K. I. Goldberg, *Organometallics* **2010**, *29*, 2176–2179.
- [2] A. D. Adler, F. R. Longo, J. D. Finarelli, J. Goldmacher, J. Assour, L. Korsakoff, *J. Org. Chem.* **1967**, *32*, 476–476.
- [3] S. Popovic, L. Wijsman, I. R. Landman, M. F. Sangster, D. Pastoors, B. B. Veldhorst, H. Hiemstra, J. H. van Maarseveen, *Eur. J. Org. Chem.* **2016**, *2016*, 443–446.
- [4] O. David, W. J. N. Meester, H. Bieräugel, H. E. Schoemaker, H. Hiemstra, J. H. van Maarseveen, *Angew. Chemie Int. Ed.* **2003**, *42*, 4373–4375.
- [5] M. Kawano, S. Sato, M. Fujita, K. Suzuki, M. Kawano, S. Sato, M. Fujita, *J. Am. Chem. Soc.* **2007**, *129*, 10652–3.
- [6] TURBOMOLE Version 7.3; TURBOMOLE GmbH, Karlsruhe, Germany, 2018.
- [7] ] (a) PQS Version 2.4; Parallel Quantum Solutions, Fayetteville, AR, USA, 2001. (b) Baker, J. J. *Comput. Chem.* 1986, *7*, 385–395.
- [8] Budzelaar, P. H. M. *J. Comput. Chem.* 2007, *28*, 2226–2236.
- [9] A. D. Becke, *Phys. Rev. A*, *38*(6), 3098–3100, (1988).
- [10] (a) Weigend, F.; Ahlrichs, R. *Phys. Chem. Chem. Phys.* 2005, *7*, 3297–3305. (b) Weigend, F.; Haser, M.; Patzelt, H.; Ahlrichs, R. *Chem. Phys. Lett.* 1998, *294*, 143–152.
- [11] Grimme, S.; Antony, J.; Ehrlich, S.; Krieg, H. *J. Chem. Phys.* 2010, *132*, 154104–154119.
